# Supplementary material
Source: PubMed Central journal article supplement (PMC7687045)
Supplement: NIHMS1643176-supplement-6.pdf [file NIHMS1643176-supplement-6.pdf]

| Type      | Short name                             | Full genotype                                                                                                                                                                     |
|-----------|----------------------------------------|-----------------------------------------------------------------------------------------------------------------------------------------------------------------------------------|
| wild-type | Canton S                               | <i>Canton S</i>                                                                                                                                                                   |
| reporter  | UAS-GFP                                | <i>20xUAS-IVS-mCD8::GFP in VK00005</i>                                                                                                                                            |
| reporter  | LexAop-GCaMP6s                         | <i>13xLexAop2-Syn21-GcaMP6s in su(Hw)attP8</i>                                                                                                                                    |
| reporter  | UAS-GCaMP6s                            | <i>20xUAS-GCaMP6s in VIE-260b; 20xUAS-GCaMP6s in VIE-57b</i>                                                                                                                      |
| reporter  | UAS-myr-FLAG, UAS-syt-HA               | <i>3xUAS-Syt::smGFP-HA in su(Hw)attP1, 5xUAS-IVS-myr::smGFP-FLAG in VK00005</i>                                                                                                   |
| reporter  | MCFO                                   | <i>pJFRC201-10xUAS-FRT&gt;STOP&gt;FRT-myr::smGFP-HA in VK00005, pJFRC240-10xUAS-FRT&gt;STOP&gt;FRT-myr::smGFP-V5-THS-10xUAS-FRT&gt;STOP&gt;FRT-myr::smGFP-FLAG in su(Hw)attP1</i> |
| reporter  | UAS-FRT-Kir2.1::tdTomato-FRT-mCD8::GFP | <i>20xUAS-IVS-FRT-Kir2.1::tdTomato-FRT-mCD8::GFP in VK00005</i>                                                                                                                   |
| reporter  | UAS-CsChrimson-mVenus, UAS-syt-HA      | <i>20xUAS-CsChrimson-mVenus, UAS-syt-HA in attP18</i>                                                                                                                             |
| reporter  | UAS-CsChrimson-mVenus                  | <i>20xUAS-CsChrimson-mVenus in attP18</i>                                                                                                                                         |
| reporter  | UAS-HaloTag                            | <i>UAS-7xHaloTag::CAAX in VK00005<sup>39</sup></i>                                                                                                                                |
| effector  | UAS-Chrimson                           | <i>10xUAS-Chrimson88-mVenus in attP2</i>                                                                                                                                          |
| effector  | UAS-Caspase3                           | <i>UAS-nz::Caspase3 in VIE-19a, UAS-Caspase3::cz in VIE-260b</i>                                                                                                                  |
| effector  | UAS-Grim                               | <i>UAS-IVS-Grim-WPRE in su(Hw)attP6</i>                                                                                                                                           |
| effector  | UAS-TNT                                | <i>UAS-TNT-E<sup>41</sup></i>                                                                                                                                                     |
| effector  | UAS-NaChBac                            | <i>UAS-NaChBac::EGFP<sup>10</sup></i>                                                                                                                                             |
| effector  | UAS-Kir2.1                             | <i>UAS-EGFP-Kir2.1<sup>5</sup></i>                                                                                                                                                |
| effector  | UAS-GtACR1                             | <i>UAS-GtACR1-EYFP in attP2<sup>42</sup></i>                                                                                                                                      |
| effector  | hs-Flp                                 | <i>hs-FlpL2::PEST in attP3</i>                                                                                                                                                    |
| driver    | oviDN-SS1                              | <i>VT050660-p65ADZp in attP40; VT028160-ZpGal4DBD in attP2</i>                                                                                                                    |
| driver    | oviDN-SS2                              | <i>VT026873-p65ADZp in attP40; VT040574-ZpGal4DBD in attP2</i>                                                                                                                    |
| driver    | oviDN-LexA                             | <i>VT040574-LexAGAD in attP40</i>                                                                                                                                                 |
| driver    | SPSN-SS                                | <i>VT058873-p65ADZp in attP40; VT003810-ZpGal4DBD in attP2</i>                                                                                                                    |
| driver    | SAG-SS                                 | <i>VT050405-p65ADZp in attP40; VT007068-ZpGal4DBD in attP2<sup>5</sup></i>                                                                                                        |
| driver    | pC1-SS1                                | <i>VT002064-p65ADZp in attP40; VT008469-ZpGal4DBD in attP2</i>                                                                                                                    |
| driver    | pC1-SS2                                | <i>VT002064-p65ADZp in attP2, dsx-ZpGal4DBD (dsx-ZpGal4DBD from ref. 29)</i>                                                                                                      |
| driver    | oviEN-SS1                              | <i>VT043086-p65ADZp in attP40; VT034612-ZpGal4DBD in attP2</i>                                                                                                                    |
| driver    | oviEN-SS2                              | <i>VT034612-p65ADZp in attP40; VT050229-ZpGal4DBD in attP2</i>                                                                                                                    |
| driver    | oviIN-SS1                              | <i>68A10-p65ADZp in attP40; VT010054-ZpGal4DBD in attP2</i>                                                                                                                       |
| driver    | oviIN-SS2                              | <i>VT026347-p65ADZp in attP40; VT026035-ZpGal4DBD in attP2</i>                                                                                                                    |
| driver    | fru-LexA                               | <i>fru-LexA<sup>40</sup></i>                                                                                                                                                      |
| driver    | dsx-LexA                               | <i>dsx-LexAp65<sup>19</sup></i>                                                                                                                                                   |
| driver    | dsx-Gal4                               | <i>dsx-Gal4<sup>43</sup></i>                                                                                                                                                      |
| driver    | oviIN-LexA                             | <i>VT026347-LexAGAD in attP40</i>                                                                                                                                                 |

## Supplementary Table 1 | Fly Stocks

| Figure         | Short genotype                                                       | Full genotype                                                                                                                                                                                                                                                           |
|----------------|----------------------------------------------------------------------|-------------------------------------------------------------------------------------------------------------------------------------------------------------------------------------------------------------------------------------------------------------------------|
| 1a             | <i>oviDN-SS1 &gt; UAS-myr-FLAG, UAS-syt-HA</i>                       | <i>w-; VT050660-p65ADZp in attP40/+; VT028160-ZpGal4DBD in attP2/3xUAS-Syt::smGFP-HA in su(Hw)attP1, 5xUAS-IVS-myr::smGFP-FLAG in VK00005</i>                                                                                                                           |
| 1b             | <i>oviDN-SS1 &gt; MCFO</i>                                           | <i>pBPhsFlp2::PEST in attP3/w-; VT050660-p65ADZp in attP40/+; VT028160-ZpGal4DBD in attP2/pJFRC201-10xUAS-FRT&gt;STOP&gt;FRT-myr::smGFP-HA in VK00005,pJFRC240-10xUAS-FRT&gt;STOP&gt;FRT-myr::smGFP-V5-THS-10xUAS-FRT&gt;STOP&gt;FRT-myr::smGFP-FLAG in su(Hw)attP1</i> |
| 1c, 1d, 2c-e   | <i>oviDN-SS2 &gt; UAS-Chrimson</i>                                   | <i>w+/w-; VT026873-p65ADZp in attP40/+; VT040574-ZpGal4DBD in attP2/10xUAS-Chrimson-mVenus in attP2</i>                                                                                                                                                                 |
| 1d             | <i>oviDN-SS1 &gt; UAS-Chrimson</i>                                   | <i>w+/w-; VT050660-p65ADZp in attP40/+; VT028160-ZpGal4DBD in attP2/10xUAS-Chrimson-mVenus in attP2</i>                                                                                                                                                                 |
| 1d-f, 2b       | <i>oviDN-SS1</i>                                                     | <i>w+/w-; VT050660-p65ADZp in attP40/+; VT028160-ZpGal4DBD in attP2/+</i>                                                                                                                                                                                               |
| 1d, 1e, 3b, 3g | <i>oviDN-SS2</i>                                                     | <i>w+/w-; VT026873-p65ADZp in attP40/+; VT040574-ZpGal4DBD in attP2/+</i>                                                                                                                                                                                               |
| 1d             | <i>UAS-Chrimson</i>                                                  | <i>w+/w-; 10xUAS-Chrimson-mVenus in attP2/+</i>                                                                                                                                                                                                                         |
| 1e, 1f, 2b     | <i>oviDN-SS1 &gt; UAS-Caspase3</i>                                   | <i>w+/w-; VT050660-p65ADZp in attP40/UAS-nz::Caspase3 in VIE-19a, UAS-Caspase3::cz in VIE-260b; VT028160-ZpGal4DBD in attP2/+</i>                                                                                                                                       |
| 1e             | <i>oviDN-SS2 &gt; UAS-Caspase3</i>                                   | <i>w+/w-; VT026873-p65ADZp in attP40/UAS-nz::Caspase3 in VIE-19a, UAS-Caspase3::cz in VIE-260b; VT040574-ZpGal4DBD in attP2/+</i>                                                                                                                                       |
| 1e             | <i>oviDN-SS1 &gt; UAS-Grim</i>                                       | <i>w+/w-; VT050660-p65ADZp in attP40/UAS-Grim in su(Hw)attP6; VT028160-ZpGal4DBD in attP2/+</i>                                                                                                                                                                         |
| 1e, 3b         | <i>oviDN-SS2 &gt; UAS-Grim</i>                                       | <i>w+/w-; VT026873-p65ADZp in attP40/UAS-Grim in su(Hw)attP6; VT040574-ZpGal4DBD in attP2/+</i>                                                                                                                                                                         |
| 1e             | <i>oviDN-SS1 &gt; UAS-TNT</i>                                        | <i>w+/w-; VT050660-p65ADZp in attP40/UAS-TNT-E; VT028160-ZpGal4DBD in attP2/+</i>                                                                                                                                                                                       |
| 1e             | <i>oviDN-SS2 &gt; UAS-TNT</i>                                        | <i>w+/w-; VT026873-p65ADZp in attP40/UAS-TNT-E; VT040574-ZpGal4DBD in attP2/+</i>                                                                                                                                                                                       |
| 1e, 1f, 2b     | <i>UAS-Caspase3</i>                                                  | <i>w+/w-; +/UAS-nz::Caspase3 in VIE-19a, UAS-Caspase3::cz in VIE-260b</i>                                                                                                                                                                                               |
| 1e, 3b, 3g     | <i>UAS-Grim</i>                                                      | <i>w+/w-; +/UAS-Grim in su(Hw)attP6</i>                                                                                                                                                                                                                                 |
| 1e, 4g, 4i     | <i>UAS-TNT</i>                                                       | <i>w+/w-; +/UAS-TNT-E</i>                                                                                                                                                                                                                                               |
| 1g             | <i>hs-Flp, oviDN-SS1 &gt; UAS-FRT-Kir2.1::tdTomato-FRT-mCD8::GFP</i> | <i>pBPhsFlp2::PEST in attP3/w-; VT050660-p65ADZp in attP40/+; VT028160-ZpGal4DBD in attP2/20xUAS-IVS-FRT-Kir2.1::tdTomato-FRT-mCD8::GFP in VK00005</i>                                                                                                                  |
| 2a, 3b, 3g     | <i>Canton S</i>                                                      | <i>Canton S</i>                                                                                                                                                                                                                                                         |
| 3a, 3h, 4h, 4j | <i>UAS-NaChBac</i>                                                   | <i>w+/w-; +/UAS-NaChBac::EGFP</i>                                                                                                                                                                                                                                       |
| 3a, 3b         | <i>SPSN-SS</i>                                                       | <i>w+/w-; VT058873-p65ADZp in attP40/+; VT003280-ZpGal4DBD in attP2/+</i>                                                                                                                                                                                               |
| 3a, 3b         | <i>SAG-SS</i>                                                        | <i>w+/w-; VT050405-p65ADZp in attP40/+; VT007068-ZpGal4DBD in attP2/+</i>                                                                                                                                                                                               |
| 3a             | <i>SPSN-SS &gt; UAS-NaChBac</i>                                      | <i>w+/w-; VT058873-p65ADZp in attP40/UAS-NaChBac::EGFP; VT003280-ZpGal4DBD in attP2/+</i>                                                                                                                                                                               |
| 3a             | <i>SAG-SS &gt; UAS-NaChBac</i>                                       | <i>w+/w-; VT050405-p65ADZp in attP40/UAS-NaChBac::EGFP; VT007068-ZpGal4DBD in attP2/+</i>                                                                                                                                                                               |
| 3b             | <i>SPSN-SS &gt; UAS-Grim</i>                                         | <i>w+/w-; VT058873-p65ADZp in attP40/UAS-Grim in su(Hw)attP6; VT003280-ZpGal4DBD in attP2/+</i>                                                                                                                                                                         |
| 3b             | <i>SAG-SS &gt; UAS-Grim</i>                                          | <i>w+/w-; VT050405-p65ADZp in attP40/UAS-Grim in su(Hw)attP6; VT007068-ZpGal4DBD in attP2/+</i>                                                                                                                                                                         |
| 3b             | <i>SPSN-SS, oviDN-SS2 &gt; UAS-Grim</i>                              | <i>w+/w-; VT058873-p65ADZp in attP40/UAS-Grim in su(Hw)attP6, VT026873-p65ADZp in attP40; VT003280-ZpGal4DBD in attP2/VT040574-ZpGal4DBD in attP2</i>                                                                                                                   |
| 3b             | <i>SAG-SS, oviDN-SS2 &gt; UAS-Grim</i>                               | <i>w+/w-; VT050405-p65ADZp in attP40/UAS-Grim in su(Hw)attP6, VT026873-p65ADZp in attP40; VT007068-ZpGal4DBD in attP2/VT040574-ZpGal4DBD in attP2</i>                                                                                                                   |
| 3c             | <i>SAG-SS &gt; MCFO</i>                                              | <i>pBPhsFlp2::PEST in attP3/w-; VT050405-p65ADZp in attP40/+; VT007068-ZpGal4DBD in attP2/pJFRC201-10xUAS-FRT&gt;STOP&gt;FRT-myr::smGFP-HA in VK00005,pJFRC240-10xUAS-FRT&gt;STOP&gt;FRT-myr::smGFP-V5-THS-10xUAS-FRT&gt;STOP&gt;FRT-myr::smGFP-FLAG in su(Hw)attP1</i> |
| 3d             | <i>pC1-SS1 &gt; MCFO</i>                                             | <i>pBPhsFlp2::PEST in attP3/w-; VT002064-p65ADZp in attP40/+; VT008469-ZpGal4DBD in attP2/pJFRC201-10xUAS-FRT&gt;STOP&gt;FRT-myr::smGFP-HA in VK00005,pJFRC240-10xUAS-FRT&gt;STOP&gt;FRT-myr::smGFP-V5-THS-10xUAS-FRT&gt;STOP&gt;FRT-myr::smGFP-FLAG in su(Hw)attP1</i> |
| 3d             | <i>pC1-SS2 &gt; MCFO</i>                                             | <i>pBPhsFlp2::PEST in attP3/w-; +/+; VT002064-p65ADZp in attP2, dsx-ZpGal4DBD/pJFRC201-10xUAS-FRT&gt;STOP&gt;FRT-myr::smGFP-HA in VK00005,pJFRC240-10xUAS-FRT&gt;STOP&gt;FRT-myr::smGFP-V5-THS-10xUAS-FRT&gt;STOP&gt;FRT-myr::smGFP-FLAG in su(Hw)attP1</i>             |
| 3d, 3e, 3f     | <i>SAG-SS &gt; UAS-Chrimson, dsx-LexA &gt; LexAop-GCaMP6s</i>        | <i>10xUAS-Chrimson88-tdTomato in attP18, 13xLexAop2-Syn21-GCaMP6s in su(Hw)attP8/w-; VT050405-p65ADZp in attP40/+; VT007068-ZpGal4DBD in attP2/dsx-LexAop65</i>                                                                                                         |
| 3g, 3h         | <i>pC1-SS1</i>                                                       | <i>w+/w-; VT002064-p65ADZp in attP40/+; VT008469-ZpGal4DBD in attP2/+</i>                                                                                                                                                                                               |
| 3g, 3h         | <i>pC1-SS2</i>                                                       | <i>w+/w-; +/+; VT002064-p65ADZp in attP2, dsx-ZpGal4DBD/+</i>                                                                                                                                                                                                           |

|                      |                                                                    |                                                                                                                                                                               |
|----------------------|--------------------------------------------------------------------|-------------------------------------------------------------------------------------------------------------------------------------------------------------------------------|
| 3g                   | <i>pC1-SS1 &gt; UAS-Grim</i>                                       | <i>w+/w-; VT002064-p65ADZp in attP40/UAS-Grim in su(Hw)attP6; VT008469-ZpGal4DBD in attP2/+</i>                                                                               |
| 3g                   | <i>pC1-SS2 &gt; UAS-Grim</i>                                       | <i>w+/w-; +/UAS-Grim in su(Hw)attP6; VT002064-p65ADZp in attP2, dsx-ZpGal4DBD/+</i>                                                                                           |
| 3g                   | <i>pC1-SS1, oviDN-SS2 &gt; UAS-Grim</i>                            | <i>w+/w-; VT002064-p65ADZp in attP40/UAS-Grim in su(Hw)attP6, VT026873-p65ADZp in attP40; VT008469-ZpGal4DBD in attP2/VT040574-ZpGal4DBD in attP2</i>                         |
| 3g                   | <i>pC1-SS2, oviDN-SS2 &gt; UAS-Grim</i>                            | <i>w+/w-; +/UAS-Grim in su(Hw)attP6, VT026873-p65ADZp in attP40; VT002064-p65ADZp in attP2, dsx-ZpGal4DBD/VT040574-ZpGal4DBD in attP2</i>                                     |
| 3h                   | <i>pC1-SS1 &gt; UAS-NaChBac</i>                                    | <i>w+/w-; VT002064-p65ADZp in attP40/UAS-NaChBac::EGFP; VT008469-ZpGal4DBD in attP2/+</i>                                                                                     |
| 3h                   | <i>pC1-SS2 &gt; UAS-NaChBac</i>                                    | <i>w+/w-; +/UAS-NaChBac::EGFP; VT002064-p65ADZp in attP2, dsx-ZpGal4DBD/+</i>                                                                                                 |
| 3i, 3j               | <i>pC1-SS1 &gt; UAS-Chrimson, oviDN-LexA &gt; LexAop-GCaMP6s</i>   | <i>10xUAS-Chrimson88-tdTomato in attP18, 13xLexAop2-Syn21-GCaMP6s in su(Hw)attP8/w-; VT002064-p65ADZp in attP40/VT040574-LexAGAD in attP40; VT008469-ZpGal4DBD in attP2/+</i> |
| 4c                   | <i>oviEN-SS1 &gt; UAS-CsChrimson-mVenus, UAS-syt-HA</i>            | <i>UAS-Syt-HA, 20xUAS-CsChrimson-mVenus in attP18/w-; VT034612-p65ADZp in attP40/+; VT050229-ZpGal4DBD in attP2/+</i>                                                         |
| 4c                   | <i>oviIN-SS1 &gt; UAS-CsChrimson-mVenus, UAS-syt-HA</i>            | <i>UAS-Syt-HA, 20xUAS-CsChrimson-mVenus in attP18/w-; VT026347-p65ADZp in attP40/+; VT026035-ZpGal4DBD in attP2/+</i>                                                         |
| 4d                   | <i>oviEN-SS1 &gt; UAS-Chrimson, oviDN-LexA &gt; LexAop-GCaMP6s</i> | <i>10xUAS-Chrimson88-tdTomato in attP18, 13xLexAop2-Syn21-GCaMP6s in su(Hw)attP8/w-; VT034612-p65ADZp in attP40/VT040574-LexAGAD in attP40; VT050229-ZpGal4DBD in attP2/+</i> |
| 4e                   | <i>oviIN-SS1 &gt; UAS-Chrimson, oviDN-LexA &gt; LexAop-GCaMP6s</i> | <i>10xUAS-Chrimson88-tdTomato in attP18, 13xLexAop2-Syn21-GCaMP6s in su(Hw)attP8/w-; VT026347-p65ADZp in attP40/VT040574-LexAGAD in attP40; VT026035-ZpGal4DBD in attP2/+</i> |
| 4f                   | <i>pC1-SS1 &gt; UAS-Chrimson, oviIN-LexA &gt; LexAop-GCaMP6s</i>   | <i>10xUAS-Chrimson88-tdTomato in attP18, 13xLexAop2-Syn21-GCaMP6s in su(Hw)attP8/w-; VT002064-p65ADZp in attP40/VT026347-LexAGAD in attP40; VT008469-ZpGal4DBD in attP2/+</i> |
| 4f                   | <i>pC1-SS2 &gt; UAS-Chrimson, oviIN-LexA &gt; LexAop-GCaMP6s</i>   | <i>10xUAS-Chrimson88-tdTomato in attP18, 13xLexAop2-Syn21-GCaMP6s in su(Hw)attP8/w-; +/VT026347-LexAGAD in attP40; VT002064-p65ADZp in attP2, dsx-ZpGal4DBD/+</i>             |
| 4g, 4h               | <i>oviEN-SS1</i>                                                   | <i>w+/w-; VT043086-p65ADZp in attP40/+; VT034612-ZpGal4DBD in attP2/+</i>                                                                                                     |
| 4g, 4h               | <i>oviEN-SS2</i>                                                   | <i>w+/w-; VT034612-p65ADZp in attP40/+; VT050229-ZpGal4DBD in attP2/+</i>                                                                                                     |
| 4g                   | <i>oviEN-SS1 &gt; UAS-TNT</i>                                      | <i>w+/w-; VT043086-p65ADZp in attP40/UAS-TNT-E; VT034612-ZpGal4DBD in attP2/+</i>                                                                                             |
| 4g                   | <i>oviEN-SS2 &gt; UAS-TNT</i>                                      | <i>w+/w-; VT034612-p65ADZp in attP40/UAS-TNT-E; VT050229-ZpGal4DBD in attP2/+</i>                                                                                             |
| 4h                   | <i>oviEN-SS1 &gt; UAS-NaChBac</i>                                  | <i>w+/w-; VT043086-p65ADZp in attP40/ UAS-NaChBac::EGFP; VT034612-ZpGal4DBD in attP2/+</i>                                                                                    |
| 4h                   | <i>oviEN-SS2 &gt; UAS-NaChBac</i>                                  | <i>w+/w-; VT034612-p65ADZp in attP40/ UAS-NaChBac::EGFP; VT050229-ZpGal4DBD in attP2/+</i>                                                                                    |
| 4i                   | <i>UAS-Kir2.1</i>                                                  | <i>w+/w-; +/+; UAS-EGFP-Kir2.1/+</i>                                                                                                                                          |
| 4i, 4j               | <i>oviIN-SS1</i>                                                   | <i>w+/w-; 68A10-p65ADZp in attP40/+; VT010054-ZpGal4DBD in attP2/+</i>                                                                                                        |
| 4i, 4j               | <i>oviIN-SS2</i>                                                   | <i>w+/w-; VT026347-p65ADZp in attP40/+; VT026035-ZpGal4DBD in attP2/+</i>                                                                                                     |
| 4i                   | <i>oviIN-SS1 &gt; UAS-TNT</i>                                      | <i>w+/w-; 68A10-p65ADZp in attP40/UAS-TNT-E; VT010054-ZpGal4DBD in attP2/+</i>                                                                                                |
| 4i                   | <i>oviIN-SS2 &gt; UAS-TNT</i>                                      | <i>w+/w-; VT026347-p65ADZp in attP40/UAS-TNT-E; VT026035-ZpGal4DBD in attP2/+</i>                                                                                             |
| 4i                   | <i>oviIN-SS1 &gt; UAS-Kir2.1</i>                                   | <i>w+/w-; 68A10-p65ADZp in attP40/+; VT010054-ZpGal4DBD in attP2/UAS-EGFP-Kir2.1</i>                                                                                          |
| 4i                   | <i>oviIN-SS2 &gt; UAS-Kir2.1</i>                                   | <i>w+/w-; VT026347-p65ADZp in attP40/+; VT026035-ZpGal4DBD in attP2/UAS-EGFP-Kir2.1</i>                                                                                       |
| 4j                   | <i>oviIN-SS1 &gt; UAS-NaChBac</i>                                  | <i>w+/w-; 68A10-p65ADZp in attP40/ UAS-NaChBac::EGFP; VT010054-ZpGal4DBD in attP2/+</i>                                                                                       |
| 4j                   | <i>oviIN-SS2 &gt; UAS-NaChBac</i>                                  | <i>w+/w-; VT026347-p65ADZp in attP40/ UAS-NaChBac::EGFP; VT026035-ZpGal4DBD in attP2/+</i>                                                                                    |
| 4l                   | <i>oviDN-SS1 &gt; UAS-GCaMP6s</i>                                  | <i>w+/w-; VT050660-p65ADZp in attP40/UAS-GCaMP6s in VIE-260b; VT028160-ZpGal4DBD in attP2/UAS-GCaMP6s in VIE-57b</i>                                                          |
| 4m                   | <i>oviIN-SS2 &gt; UAS-GCaMP6s</i>                                  | <i>w+/w-; VT026347-p65ADZp in attP40/UAS-GCaMP6s in VIE-260b; VT026035-ZpGal4DBD in attP2/UAS-GCaMP6s in VIE-57b</i>                                                          |
| 4n                   | <i>oviEN-SS1 &gt; UAS-GCaMP6s</i>                                  | <i>w+/w-; VT043086-p65ADZp in attP40/UAS-GCaMP6s in VIE-260b; VT034612-ZpGal4DBD in attP2/UAS-GCaMP6s in VIE-57b</i>                                                          |
| Extended Data Fig. 1 | <i>oviDN-SS1 &gt; UAS-myrFLAG, UAS-sytHA</i>                       | <i>w-; VT050660-p65ADZp in attP40/+; VT028160-ZpGal4DBD in attP2/3xUAS-Syt::smGFP-HA in su(Hw)attP1, 5xUAS-IVS-myr::smGFP-FLAG in VK00005</i>                                 |
| Extended Data Fig. 1 | <i>oviDN-SS2 &gt; UAS-myrFLAG, UAS-sytHA</i>                       | <i>w-; VT026873-p65ADZp in attP40/+; VT040574-ZpGal4DBD in attP2/3xUAS-Syt::smGFP-HA in su(Hw)attP1, 5xUAS-IVS-myr::smGFP-FLAG in VK00005</i>                                 |
| Extended Data Fig. 1 | <i>SPSN-SS &gt; UAS-myrFLAG, UAS-sytHA</i>                         | <i>w-; VT058873-p65ADZp in attP40/+; VT003280-ZpGal4DBD in attP2/3xUAS-Syt::smGFP-HA in su(Hw)attP1, 5xUAS-IVS-myr::smGFP-FLAG in VK00005</i>                                 |
| Extended Data Fig. 1 | <i>SAG-SS &gt; UAS-myrFLAG, UAS-sytHA</i>                          | <i>w-; VT050405-p65ADZp in attP40/+; VT007068-ZpGal4DBD in attP2/3xUAS-Syt::smGFP-HA in su(Hw)attP1, 5xUAS-IVS-myr::smGFP-FLAG in VK00005</i>                                 |
| Extended Data Fig. 1 | <i>pC1-SS1 &gt; UAS-myrFLAG, UAS-sytHA</i>                         | <i>w-; VT002064-p65ADZp in attP40/+; VT008469-ZpGal4DBD in attP2/3xUAS-Syt::smGFP-HA in su(Hw)attP1, 5xUAS-IVS-myr::smGFP-FLAG in VK00005</i>                                 |

|                           |                                                                             |                                                                                                                                                                                                                                                                          |
|---------------------------|-----------------------------------------------------------------------------|--------------------------------------------------------------------------------------------------------------------------------------------------------------------------------------------------------------------------------------------------------------------------|
| Extended Data Fig. 1      | <i>pC1-SS2 &gt; UAS-CsChrimson-mVenus, UAS-syt-HA</i>                       | <i>20xUAS-CsChrimson-mVenus, UAS-syt-HA in attP18 /w-; +/+; VT002064-p65ADZp, dsx-ZpGal4DBD/+</i>                                                                                                                                                                        |
| Extended Data Fig. 1      | <i>oviEN-SS1 &gt; UAS-CsChrimson-mVenus, UAS-syt-HA</i>                     | <i>20xUAS-CsChrimson-mVenus, UAS-syt-HA in attP18 /w-; VT043086-p65ADZp in attP40/+; VT034612-ZpGal4DBD in attP2/+</i>                                                                                                                                                   |
| Extended Data Fig. 1      | <i>oviEN-SS2 &gt; UAS-CsChrimson-mVenus, UAS-syt-HA</i>                     | <i>20xUAS-CsChrimson-mVenus, UAS-syt-HA in attP18 /w-; VT034612-p65ADZp in attP40/+; VT050229-ZpGal4DBD in attP2/+</i>                                                                                                                                                   |
| Extended Data Fig. 1      | <i>oviIN-SS1 &gt; UAS-CsChrimson-mVenus, UAS-syt-HA</i>                     | <i>20xUAS-CsChrimson-mVenus, UAS-syt-HA in attP18 /w-; 68A10-p65ADZp in attP40/+; VT010054-ZpGal4DBD in attP2/+</i>                                                                                                                                                      |
| Extended Data Fig. 1      | <i>oviIN-SS2 &gt; UAS-CsChrimson-mVenus, UAS-syt-HA</i>                     | <i>20xUAS-CsChrimson-mVenus, UAS-syt-HA in attP18 /w-; VT026347-p65ADZp in attP40/+; VT026035-ZpGal4DBD in attP2/+</i>                                                                                                                                                   |
| Extended Data Fig. 2      | <i>oviDN-SS1 &gt; UAS-tdTomato, fru-LexA &gt; LexAop-GCaMP6s</i>            | <i>10xUAS-Chrimson88-tdTomato in attP18, 13xLexAop2-Syn21-GCaMP6s in su(Hw)attP8/w-; VT050660-p65ADZp in attP40/+; VT028160-ZpGal4DBD in attP2/fru-LexA</i>                                                                                                              |
| Extended Data Fig. 2      | <i>oviDN-SS2 &gt; UAS-tdTomato, fru-LexA &gt; LexAop-GCaMP6s</i>            | <i>10xUAS-Chrimson88-tdTomato in attP18, 13xLexAop2-Syn21-GCaMP6s in su(Hw)attP8/w-; VT026873-p65ADZp in attP40/+; VT040574-ZpGal4DBD in attP2/fru-LexA</i>                                                                                                              |
| Extended Data Fig. 2      | <i>pC1-SS1 &gt; UAS-tdTomato, fru-LexA &gt; LexAop-GCaMP6s</i>              | <i>10xUAS-Chrimson88-tdTomato in attP18, 13xLexAop2-Syn21-GCaMP6s in su(Hw)attP8/w-; VT002064-p65ADZp in attP40/+; VT008469-ZpGal4DBD in attP2/fru-LexA</i>                                                                                                              |
| Extended Data Fig. 2      | <i>oviDN-SS1 &gt; UAS-tdTomato, dsx-LexA &gt; LexAop-GCaMP6s</i>            | <i>10xUAS-Chrimson88-tdTomato in attP18, 13xLexAop2-Syn21-GCaMP6s in su(Hw)attP8/w-; VT050660-p65ADZp in attP40/+; VT028160-ZpGal4DBD in attP2/dsx-LexA p65</i>                                                                                                          |
| Extended Data Fig. 2      | <i>oviDN-SS2 &gt; UAS-tdTomato, dsx-LexA &gt; LexAop-GCaMP6s</i>            | <i>10xUAS-Chrimson88-tdTomato in attP18, 13xLexAop2-Syn21-GCaMP6s in su(Hw)attP8/w-; VT026873-p65ADZp in attP40/+; VT040574-ZpGal4DBD in attP2/dsx-LexA p65</i>                                                                                                          |
| Extended Data Fig. 2      | <i>pC1-SS1 &gt; UAS-tdTomato, dsx-LexA &gt; LexAop-GCaMP6s</i>              | <i>10xUAS-Chrimson88-tdTomato in attP18, 13xLexAop2-Syn21-GCaMP6s in su(Hw)attP8/w-; VT002064-p65ADZp in attP40/+; VT008469-ZpGal4DBD in attP2/dsx-LexA p65</i>                                                                                                          |
| Extended Data Fig. 3      | <i>oviDN-SS2 &gt; UAS-HaloTag</i>                                           | <i>w-; VT026873-p65ADZp in attP40/+ ; VT040574-ZpGal4DBD in attP2/UAS-7xHaloTag::CAAX in VK00005</i>                                                                                                                                                                     |
| Extended Data Fig. 3      | <i>SAG-SS &gt; UAS-HaloTag</i>                                              | <i>w-; VT050405-p65ADZp in attP40/+ ; VT007068-ZpGal4DBD in attP2/UAS-7xHaloTag::CAAX in VK00005</i>                                                                                                                                                                     |
| Extended Data Fig. 3      | <i>pC1-SS1 &gt; UAS-HaloTag</i>                                             | <i>w-; VT002064-p65ADZp in attP40/+ ; VT008469-ZpGal4DBD in attP2/UAS-7xHaloTag::CAAX in VK00005</i>                                                                                                                                                                     |
| Extended Data Fig. 3      | <i>oviEN-SS1 &gt; UAS-HaloTag</i>                                           | <i>w-; VT043086-p65ADZp in attP40/+ ; VT034612-ZpGal4DBD /UAS-7xHaloTag::CAAX in VK00005</i>                                                                                                                                                                             |
| Extended Data Fig. 3      | <i>oviIN-SS1 &gt; UAS-HaloTag</i>                                           | <i>w-; 68A10-p65ADZp in attP40/+ ; VT010054-ZpGal4DBD in attP2/UAS-7xHaloTag::CAAX in VK00005</i>                                                                                                                                                                        |
| Extended Data Fig. 4a     | <i>oviDN-SS1 &gt; UAS-GFP</i>                                               | <i>w-; VT050660-p65ADZp in attP40/+; VT028160-ZpGal4DBD, 20xUAS-IVS-mCD8::GFP in VK00005/+</i>                                                                                                                                                                           |
| Extended Data Fig. 4a     | <i>oviDN-SS2 &gt; UAS-GFP</i>                                               | <i>w-; VT026873-p65ADZp in attP40/+; VT040574-ZpGal4DBD, 20xUAS-IVS-mCD8::GFP in VK00005/+</i>                                                                                                                                                                           |
| Extended Data Fig. 4a     | <i>oviDN-SS1 &gt; UAS-GFP, UAS-Grim</i>                                     | <i>w-; VT050660-p65ADZp in attP40/UAS-Grim in su(Hw)attP6; VT028160-ZpGal4DBD, 20xUAS-IVS-mCD8::GFP in VK00005/+</i>                                                                                                                                                     |
| Extended Data Fig. 4a     | <i>oviDN-SS2 &gt; UAS-GFP, UAS-Grim</i>                                     | <i>w-; VT026873-p65ADZp in attP40/UAS-Grim in su(Hw)attP6; VT040574-ZpGal4DBD, 20xUAS-IVS-mCD8::GFP in VK00005/+</i>                                                                                                                                                     |
| Extended Data Fig. 4b     | <i>oviDN-SS1</i>                                                            | <i>w-; VT050660-p65ADZp in attP40/+; VT028160-ZpGal4DBD/+</i>                                                                                                                                                                                                            |
| Extended Data Fig. 4b, 4c | <i>oviDN-SS2</i>                                                            | <i>w-; VT026873-p65ADZp in attP40/+; VT040574-ZpGal4DBD/+</i>                                                                                                                                                                                                            |
| Extended Data Fig. 4b, 4c | <i>UAS-Caspase3</i>                                                         | <i>w+/w-; +/UAS-nz::Caspase3 in VIE-19a, UAS-Caspase3::cz in VIE-260b</i>                                                                                                                                                                                                |
| Extended Data Fig. 4b     | <i>oviDN-SS1 &gt; UAS-Caspase3</i>                                          | <i>w+/w-; VT050660-p65ADZp in attP40/UAS-nz::Caspase3 in VIE-19a, UAS-Caspase3::cz in VIE-260b; VT028160-ZpGal4DBD in attP2/+</i>                                                                                                                                        |
| Extended Data Fig. 4b, 4c | <i>oviDN-SS2 &gt; UAS-Caspase3</i>                                          | <i>w+/w-; VT026873-p65ADZp in attP40/UAS-nz::Caspase3 in VIE-19a, UAS-Caspase3::cz in VIE-260b; VT040574-ZpGal4DBD in attP2/+</i>                                                                                                                                        |
| Extended Data Fig. 5a     | <i>oviDN-SS1 &gt; MCFO</i>                                                  | <i>pBPhsFlp2::PEST in attP3/w-; VT050660-p65ADZp in attP40/+; VT028160-ZpGal4DBD in attP2/pJFRC201-10xUAS-FRT&gt;STOP&gt;FRT-myr::smGFP-HA in VK00005, pJFRC240-10xUAS-FRT&gt;STOP&gt;FRT-myr::smGFP-V5-THS-10xUAS-FRT&gt;STOP&gt;FRT-myr::smGFP-FLAG in su(Hw)attP1</i> |
| Extended Data Fig. 5b     | <i>hs-FlpL::PEST, oviDN-SS1 &gt; UAS-FRT-Kir2.1::tdTomato-FRT-mCD8::GFP</i> | <i>pBPhsFlp2::PEST in attP3/w-; VT050660-p65ADZp in attP40/+; VT028160-ZpGal4DBD in attP2/20xUAS-IVS-FRT-Kir2.1::tdTomato-FRT-mCD8::GFP in VK00005</i>                                                                                                                   |
| Extended Data Fig. 5c     | <i>hs-FlpL::PEST, oviDN-SS2 &gt; UAS-FRT-Kir2.1::tdTomato-FRT-mCD8::GFP</i> | <i>pBPhsFlp2::PEST in attP3/w-; VT026873-p65ADZp in attP40/+; VT040574-ZpGal4DBD in attP2/20xUAS-IVS-FRT-Kir2.1::tdTomato-FRT-mCD8::GFP in VK00005</i>                                                                                                                   |
| Extended Data Fig. 5d     | <i>pC1-SS1 &gt; UAS-Chrimson, oviDN-LexA &gt; LexAop-GCaMP6s</i>            | <i>10xUAS-Chrimson88-tdTomato in attP18, 13xLexAop2-Syn21-GCaMP6s in su(Hw)attP8/w-; VT002064-p65ADZp in attP40/VT040574-LexAGAD in attP40; VT008469-ZpGal4DBD in attP2/+</i>                                                                                            |
| Extended Data Fig. 6      | <i>oviDN-SS2 &gt; UAS-Chrimson</i>                                          | <i>w+/w-; VT026873-p65ADZp in attP40/+; VT040574-ZpGal4DBD in attP2/10xUAS-Chrimson-mVenus in attP2</i>                                                                                                                                                                  |
| Extended Data Fig. 7a     | <i>pC1-SS1 &gt; MCFO</i>                                                    | <i>pBPhsFlp2::PEST in attP3/w-; VT002064-p65ADZp in attP40/+; VT008469-ZpGal4DBD in attP2/pJFRC201-10xUAS -FRT&gt;STOP&gt;FRT-myr::smGFP-HA in VK00005, pJFRC240-</i>                                                                                                    |

|                           |                                                               |                                                                                                                                                                                                                                                                |
|---------------------------|---------------------------------------------------------------|----------------------------------------------------------------------------------------------------------------------------------------------------------------------------------------------------------------------------------------------------------------|
| Extended Data Fig. 7a     | <i>pC1-SS2 &gt; MCFO</i>                                      | <i>10xUAS -FRT&gt;STOP&gt;FRT-myr::smGFP-V5-THS-10xUAS -FRT&gt;STOP&gt;FRT-myr::smGFP-FLAG in su(Hw)attP1</i>                                                                                                                                                  |
| Extended Data Fig. 7b     | <i>SAG-SS &gt; UAS-Chrimson, dsx-LexA &gt; LexAop-GCaMP6s</i> | <i>pBPhsFlp2::PEST in attP3/w-; +/-; VT002064-p65ADZp in attP2, dsx-ZpGal4DBD/pJFRC201-10xUAS -FRT&gt;STOP&gt;FRT-myr::smGFP-HA in VK00005,pJFRC240-10xUAS -FRT&gt;STOP&gt;FRT-myr::smGFP-V5-THS-10xUAS -FRT&gt;STOP&gt;FRT-myr::smGFP-FLAG in su(Hw)attP1</i> |
| Extended Data Fig. 7c, 7d | <i>UAS-GtACR1</i>                                             | <i>10xUAS-Chrimson88-tdTomato in attP18, 13xLexAop2-Syn21-GCaMP6s in su(Hw)attP8/w-; VT050405-p65ADZp in attP40/+; VT007068-ZpGal4DBD in attP2/dsx-LexAp65</i>                                                                                                 |
| Extended Data Fig. 7c, 7d | <i>SAG-SS</i>                                                 | <i>w+/w-; VT050405-p65ADZp in attP40/+; VT007068-ZpGal4DBD in attP2/+</i>                                                                                                                                                                                      |
| Extended Data Fig. 7c, 7d | <i>pC1-SS1</i>                                                | <i>w+/w-; VT002064-p65ADZp in attP40/+; VT008469-ZpGal4DBD in attP2/+</i>                                                                                                                                                                                      |
| Extended Data Fig. 7c, 7d | <i>SAG-SS &gt; UAS-GtACR1</i>                                 | <i>w+/w-; VT050405-p65ADZp in attP40/+; VT007068-ZpGal4DBD in attP2/UAS-GtACR1-EYFP in attP2</i>                                                                                                                                                               |
| Extended Data Fig. 7c, 7d | <i>pC1-SS1 &gt; UAS-GtACR1</i>                                | <i>w+/w-; VT002064-p65ADZp in attP40/+; VT008469-ZpGal4DBD in attP2/UAS-GtACR1-EYFP in attP2</i>                                                                                                                                                               |
| Extended Data Fig. 7e     | <i>dsx-Gal4 &gt; UAS-GCaMP6s</i>                              | <i>w+/w-; UAS-GCaMP6s in VIE-260b/+; dsx-Gal4/UAS-GCaMP6s in VIE-57b</i>                                                                                                                                                                                       |
| Extended Data Fig. 8a-c   | <i>Canton S</i>                                               | <i>Canton S</i>                                                                                                                                                                                                                                                |
| Extended Data Fig. 8d, 8e | <i>oviDN-SS1 &gt; UAS-GCaMP6s</i>                             | <i>w+/w-; VT050660-p65ADZp in attP40/UAS-GCaMP6s in VIE-260b; VT028160-ZpGal4DBD in attP2/UAS-GCaMP6s in VIE-57b</i>                                                                                                                                           |
| Extended Data Fig. 8d, 8e | <i>oviIN-SS2 &gt; UAS-GCaMP6s</i>                             | <i>w+/w-; VT026347-p65ADZp in attP40/UAS-GCaMP6s in VIE-260b; VT026035-ZpGal4DBD in attP2/UAS-GCaMP6s in VIE-57b</i>                                                                                                                                           |
| Extended Data Fig. 8d, 8e | <i>oviEN-SS1 &gt; UAS-GCaMP6s</i>                             | <i>w+/w-; VT043086-p65ADZp in attP40/UAS-GCaMP6s in VIE-260b; VT034612-ZpGal4DBD in attP2/UAS-GCaMP6s in VIE-57b</i>                                                                                                                                           |

## Supplementary Table 2 | Fly genotypes in figures
